# Supplementary material
Source: PubMed Central journal article supplement (PMC3302627)
Supplement: supp_78.7.2221_AEM-AEM06761-11-s01.pdf [file supp_78.7.2221_AEM-AEM06761-11-s01.pdf]

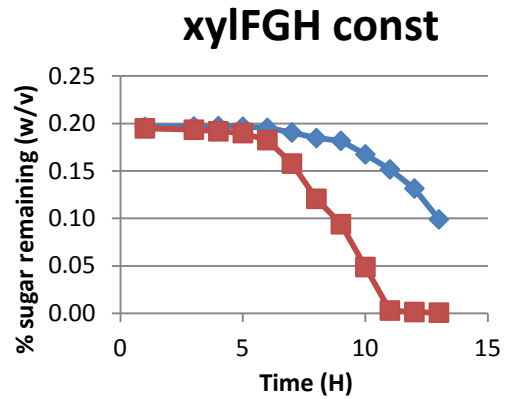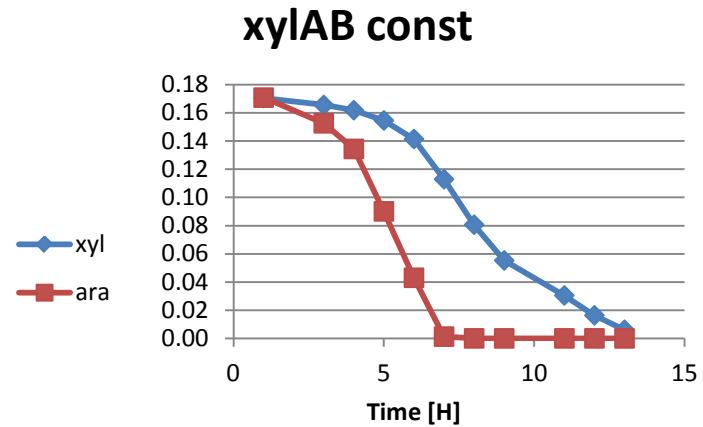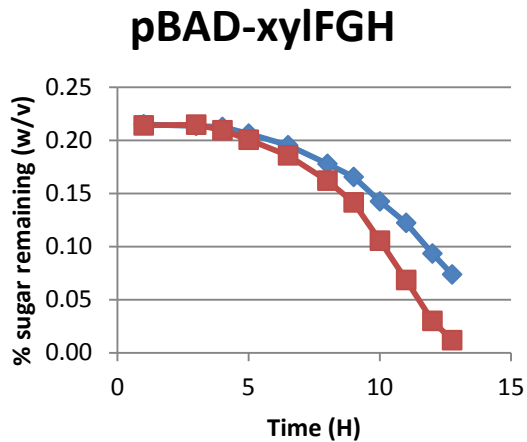

Figure S1: Neither low-level supplementation with xylAB nor xylFGH is sufficient to eliminate ara/xyl diauxie. Strain MG1655 transformed with the indicated plasmids were grown overnight and then diluted 1:20 into fresh MMM supplemented with 0.4% total sugars and appropriate antibiotics. Cultures were grown at 37° with 200 RPM agitation. Samples were withdrawn at indicated time points, the OD<sub>600</sub> was measured and the sugar was analyzed using liquid chromatography with refractive index detection.

| Q1      | Q3       | Protein | Sequence               |
|---------|----------|---------|------------------------|
| 506.303 | 702.393  | araA1   | araA.LPVANALWK.y6      |
| 617.288 | 705.336  | araA2   | araA.WNEVYYGFR.y5      |
| 670.882 | 986.531  | araB    | araB.QLLPALTEAWAK.y9   |
| 527.798 | 629.325  | xylB2   | xylB.LAQIAANPEK.y6     |
| 506.806 | 685.388  | xylF1   | xylF.LLTPIDVNK.y6      |
| 523.777 | 759.436  | xylF2   | xylF.ADTTLNNGLK.y7     |
| 535.316 | 730.373  | xylG    | xylG.ILILDEPTR.y6      |
| 529.801 | 775.406  | xylR1   | xylR.VALSSVAQGAR.y8    |
| 517.306 | 819.472  | xylR2   | xylR.ITLLFNANK.y7      |
| 574.78  | 870.45   | XylA1   | xylA.FMQMVVEHK.y7      |
| 678.33  | 1023.51  | XylA2   | XylA.AGGFTTGGLNFDK.y10 |
| 643.864 | 1158.663 | araC1   | araC.QQLGISVLSWR.y10   |
| 643.864 | 1030.604 | araC2   | araC.QQLGISVLSWR.y9    |
| 643.864 | 917.52   | araC3   | araC.QQLGISVLSWR.y8    |
| 643.864 | 860.499  | araC4   | araC.QQLGISVLSWR.y7    |
| 643.864 | 747.415  | araC5   | araC.QQLGISVLSWR.y6    |
| 643.864 | 660.383  | araC6   | araC.QQLGISVLSWR.y5    |
| 643.864 | 561.314  | araC6   | araC.QQLGISVLSWR.y4    |
| 563.286 | 997.47   | araD1   | araD.KPSSDTPTHR.y9     |
| 563.286 | 900.417  | araD2   | araD.KPSSDTPTHR.y8     |
| 563.286 | 813.385  | araD3   | araD.KPSSDTPTHR.y7     |
| 563.286 | 726.353  | araD1   | araD.KPSSDTPTHR.y6     |
| 563.286 | 611.326  | araD2   | araD.KPSSDTPTHR.y5     |
| 563.286 | 510.278  | araD3   | araD.KPSSDTPTHR.y4     |

Table S2: Protein transitions used for measuring relative concentrations of xyl and ara proteins.

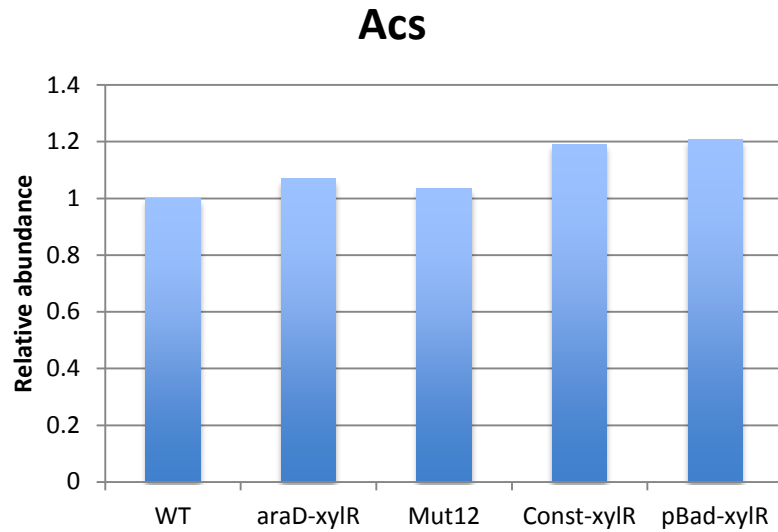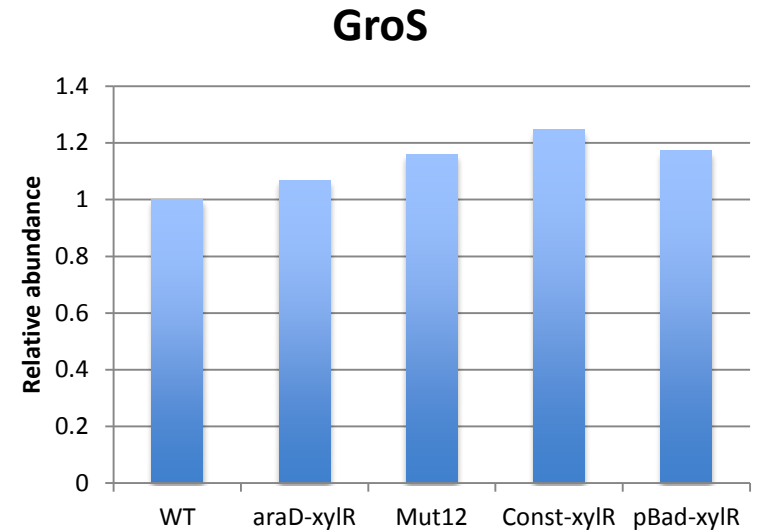

Figure S3: Housekeeping genes Acs and GroS have consistent concentrations for all treatments. See text for details.

| Primer name          | Sequence                                                     |
|----------------------|--------------------------------------------------------------|
| S8A-xyIR xyIR Gib F  | gatctttaagaaggagatatacatATGTTTACTAAACGTCACCCGCATC            |
| S8A-xyIR xyIR Gib R  | ggagatccttactcgagtttggatccCTACAACATGACCTCGCTATTTACATCGCG     |
| S8A-xyIR S8A Gib F   | CGCGATGTAAATAGCGAGGTCATGTTGTAGggatccaaactcgagtaaggatctcc     |
| S8A-xyIR S8A Gib R   | GATGCGGTGACGTTTAGTAAACATatgtatatctccttcttaaaagatc            |
| pUA66 PxylA F        | AGCATctcgagCATGGTGTAGGGCCTTCTGTAGTTAG                        |
| pUA66 PxylA R        | AGCATggatccTAATATTGGGCACTCCCTTTTCAGTTG                       |
| xyIR SD OPT F        | GTAATTTAAGAAGGAGGAATACATATGTTTACTAAACGTCAC                   |
| xyIR SD OPT R        | GTTTAGTAAACATATGTATTCCTCCTTCTTAAAATTACTGCC                   |
| BB xyIAB EcoRI F     | agcatGAATTCttaagaaggaggatatacatATGCAAGCCTATTTTGACC           |
| BB xyIAB BamHI R     | ATGCTggatccTACGCCATTAATGGCAGAAGTTGCTGATAG                    |
| BB xyIFGH EcoRI F    | agcatGAATTCttaagaaggaggatatacatATGAAAATAAAGAACATTCTACTCACCC  |
| BB xyIFGH BamHI R    | ATGCTggatccTCAAGAACGGCGTTTGGTTGCGGAG                         |
| PxylF const R        | GATAAAAATCTGTAATTGTTTTCCCCTGTTTAGTTGCTAAAAA                  |
| PxylF const F        | AGCATggatccATTTAGCAACTgAACAGGGcttgtCAATTACAGATTTTATC         |
| xyIAB BamHI F        | TATTAGGATCCTCTAGATTTAAGAAGGAGATATACATATGCAAGCCTATTTTGACC     |
| xyIAB KpnI R         | ATGCTggatccTACGCCATTAATGGCAGAAGTTGCTGATAG                    |
| pUA66 const R        | GTATATCCTTCTTAAATCTAGAGG                                     |
| pUA66 const F        | AGCATggtaCCTGAATTGTACAAATAAATGTCC                            |
| xyIFGH Con HindIII F | CTCTAGATTTAAGAAGGAGATaagcttATGAAAATAAAGAACATTCTAC            |
| xyIFGH Con KpnI R    | CATGCCTGCAGGTCTGGACATggtaccTCAAGAACGGCGTTTGGTTG              |
| xyIR Con HindIII F   | GAGATaagcttATGTTTACTAAACGTCACCCG                             |
| xyIR Con KpnI F      | GACATggtaccCTACAACATGACCTCGCTATTTAC                          |
| pUA66 con KpnI F     | CAACCAAACGCCGTTCTTGAgtaccATGTCCAGACCTGCAGGCATG               |
| pUA66 con HindIII R  | GTAGAATGTTCTTTATTTTCAaagcttATCTCCTTCTTAAATCTAGAG             |
| araD-xyIR F          | GAAGGCATATTACGGGCAGTAAtttaagaaggagatatacatATG                |
| araD-xyIR R          | GGCGTTTGAGATCTTCTAACATgatctttgaattcccaaaaaaacgg              |
| araD KO F            | GCGCGCGCTCTTTGTGATCAAACCTTCCGGCGTCGATTACgtgtaggctggagctgcttc |
| araD KO R            | AGCCTGGTTTCGTTTGATTGGCTGTGGTTTTATACAGTCAatccggggatccgctgacc  |
| araD KI FI           | GGTATTAGAAGCCAACCTGG                                         |
| xyIR KI R            | agcctGGTTTCGTTTGATTGGCTGTGGTTTTATACAGTCAcCTACAACATGACCTCGC   |

Table S4: Primers used for all constructs and mutagenesis.
